# Supplementary material for: In vitro and in vivo assessment of sporopollenin exine capsule preparations (SpECs) from Lycopodium clavatum spores
Source: Royal Society of Chemistry journal article supplement (doi:10.1039/d5ra09999d), 2026-04-07

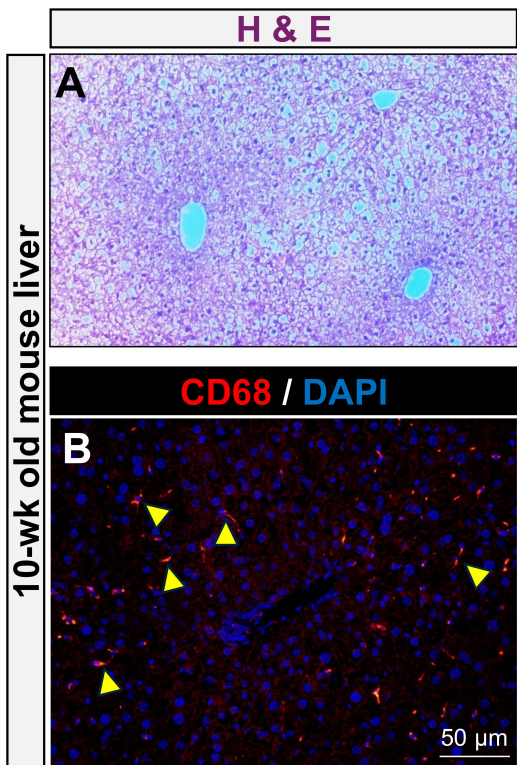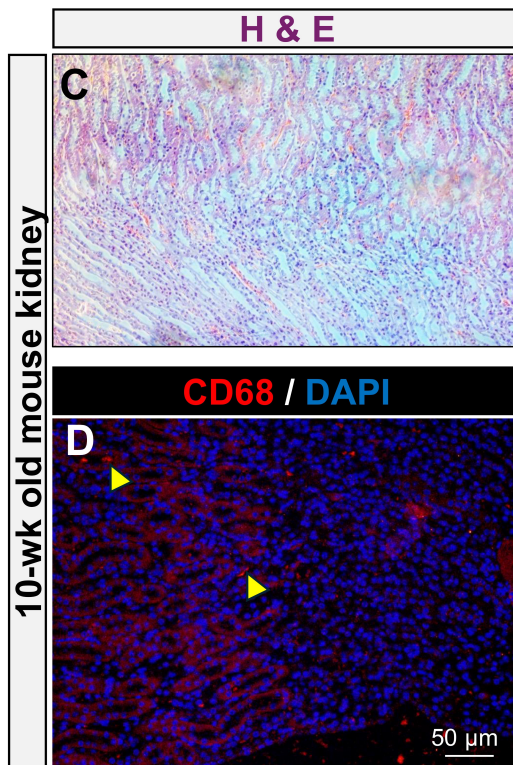

Supplement: d5ra09999d2.pdf [file d5ra09999d2.pdf]
